# Supplementary material
Source: Springer Nature journal article supplement (https://www.springermedizin.de/resource/supplementary/12885_2013_4714_MOESM4_ESM.pdf/9467112)
Supplement: MOESM4 [file 9467112]

**Additional File 4.**

**Title:** MicroRNA selected for this study from miRNAs significantly associated with young women's breast cancer in discovery set and its validation.

**Description:** Clusters were constructed using Average hierarchical clustering method. Statistics of the discovery set were calculated via t-test. FDR stands for False Discovery rate multitesting corrected p-value. Only miRNAs remarked in bold were validated on an independent set of patients. Fold change of the validation set were calculated using  $\Delta\Delta\text{Ct}$  method and p-values were estimated via ANOVA test comparing the age groups and adjusted for multiple testing using Tukey's method. Bold denotes significant associated results in validation set.

**Additional File 4.** MicroRNA selected for this study from miRNAs significantly associated with young women's breast cancer in discovery set and its validation.

| cluster | miR             | Discovery set (n=37)  |             | Validation set (n=56)        |
|---------|-----------------|-----------------------|-------------|------------------------------|
|         |                 | FDR                   | Fold change | Adjusted p-value             |
| Node 15 | hsa-miR-1275    | 1.40x10 <sup>-4</sup> | 5.89        | <b>2.86x10<sup>-3</sup></b>  |
|         | hsa-miR-1207-5p | 7.60x10 <sup>-4</sup> | 4.86        | 0.047                        |
|         | hsa-miR-4281    | 1.37x10 <sup>-3</sup> | 4.61        |                              |
|         | hsa-miR-1268    | 7.2x10 <sup>-4</sup>  | 5.01        |                              |
|         | hsa-miR-663     | 1.29x10 <sup>-3</sup> | 4.04        |                              |
|         | hsa-miR-149     | 4.10x10 <sup>-3</sup> | -4.03       | 0.712                        |
|         | hsa-miR-762     | 1.40x10 <sup>-4</sup> | 6.65        |                              |
|         | hsa-miR-3196    | 1.40x10 <sup>-4</sup> | 6.74        | <b>1.98x10<sup>-4</sup></b>  |
|         | hsa-miR-1908    | 1.40x10 <sup>-4</sup> | 5.41        |                              |
|         | hsa-miR-1228*   | 1.40x10 <sup>-4</sup> | 6.02        | <b>4.73 x10<sup>-5</sup></b> |
|         | hsa-miR-3141    | 1.90x10 <sup>-4</sup> | 5.30        |                              |
|         | hsa-miR-92b     | 7.00x10 <sup>-4</sup> | -4.60       | <b>0.012</b>                 |
| Node 63 | hsa-miR-139-5p  | 0.020                 | -3.13       | <b>0.018</b>                 |
|         | hsa-miR-132     | 1.40x10 <sup>-4</sup> | -5.57       | 0.908                        |
|         | hsa-miR-379     | 0.092                 | -2.14       | 0.052                        |
|         | hsa-miR-409-3p  | 0.043                 | -2.62       | 0.107                        |
|         | hsa-miR-134     | 0.086                 | -2.20       |                              |
|         | hsa-miR-127-3p  | 0.050                 | -2.53       |                              |
|         | hsa-miR-433     | 0.093                 | -2.15       | 0.132                        |
|         | hsa-miR-181a-2* | 0.029                 | -2.92       |                              |

Clusters were constructed using Average hierarchical clustering method. Statistics of the discovery set were calculated via t-test. FDR stands for False Discovery rate multitesting corrected p-value. Only miRNAs remarked in bold were validated on an independent set of patients. Expression values of the validation set were calculated using  $\Delta\Delta\text{Ct}$  method and p-values were estimated via ANOVA test comparing the age groups and adjusted for multiple testing using Tukey's method. Bold denotes significant associated results in validation set.
